# Supplementary material
Source: PubMed Central journal article supplement (PMC3603393)

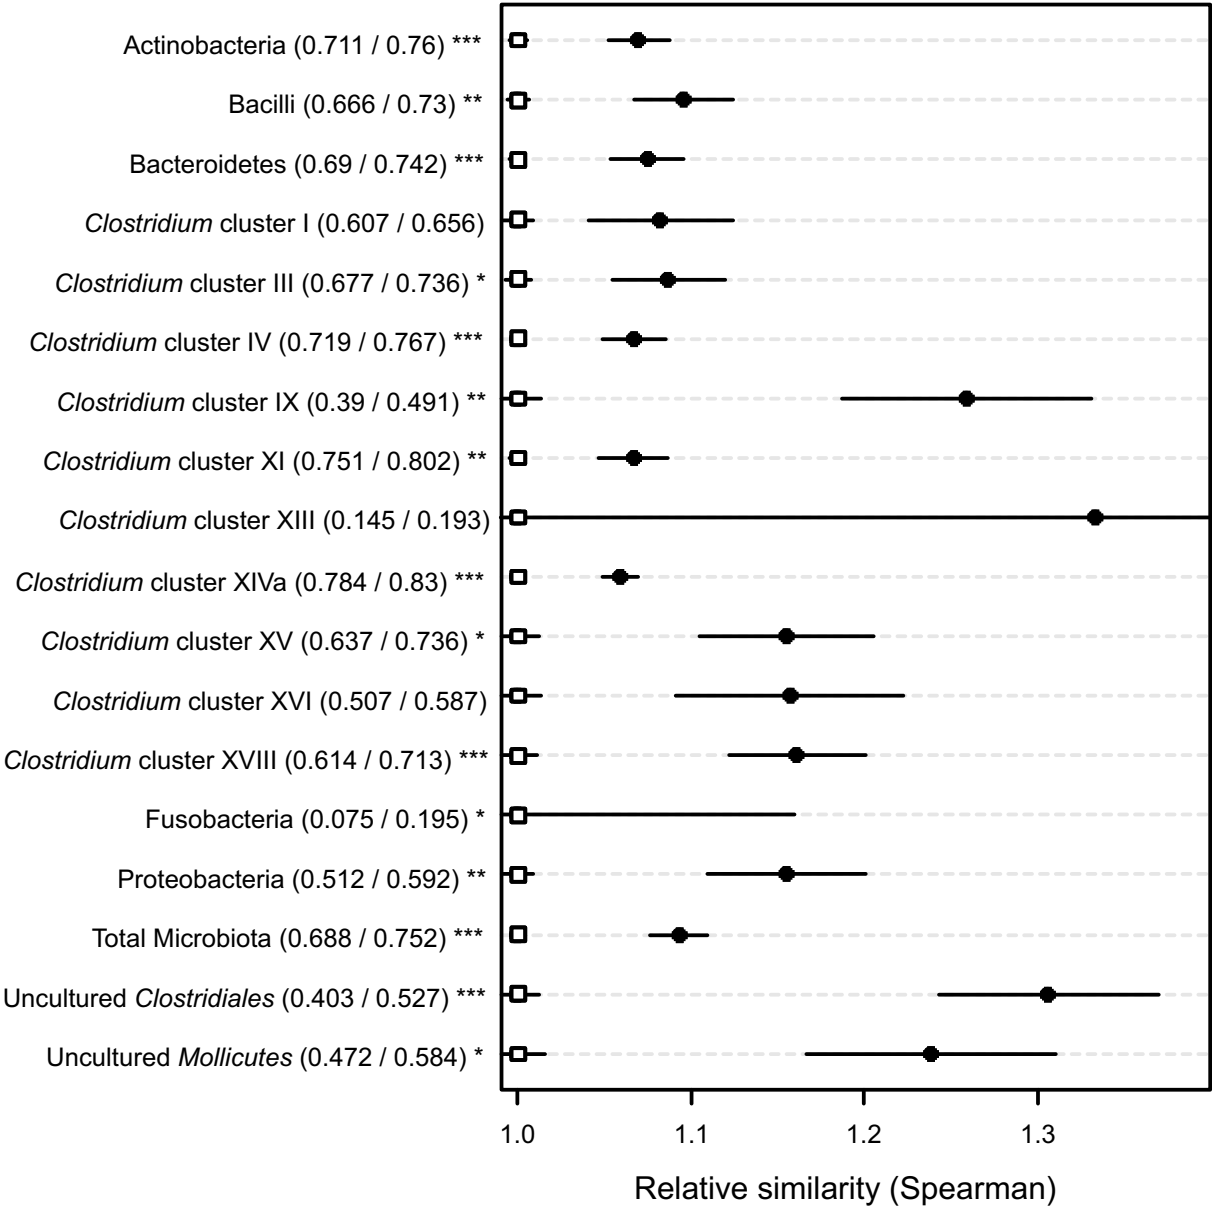

Supplement: ismej2012146x1.pdf [file ismej2012146x1.pdf]

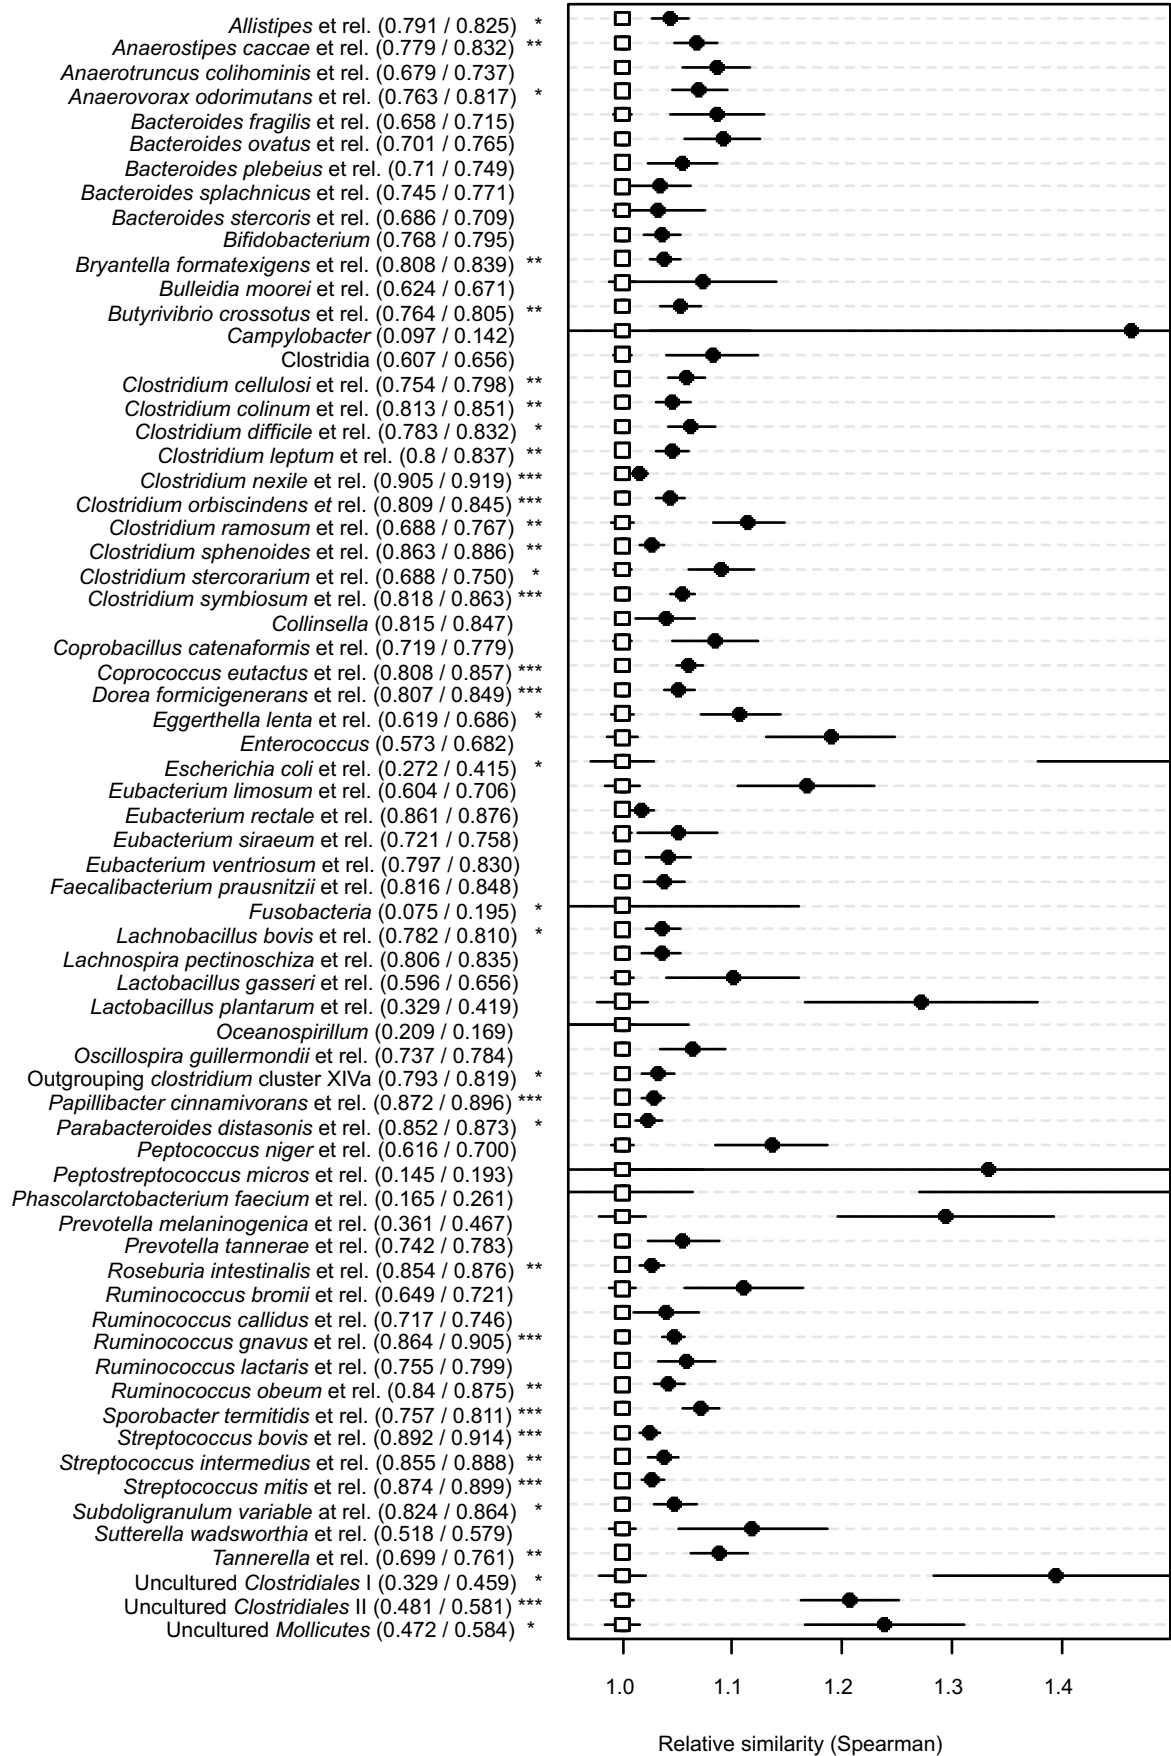

Supplement: ismej2012146x2.pdf [file ismej2012146x2.pdf]

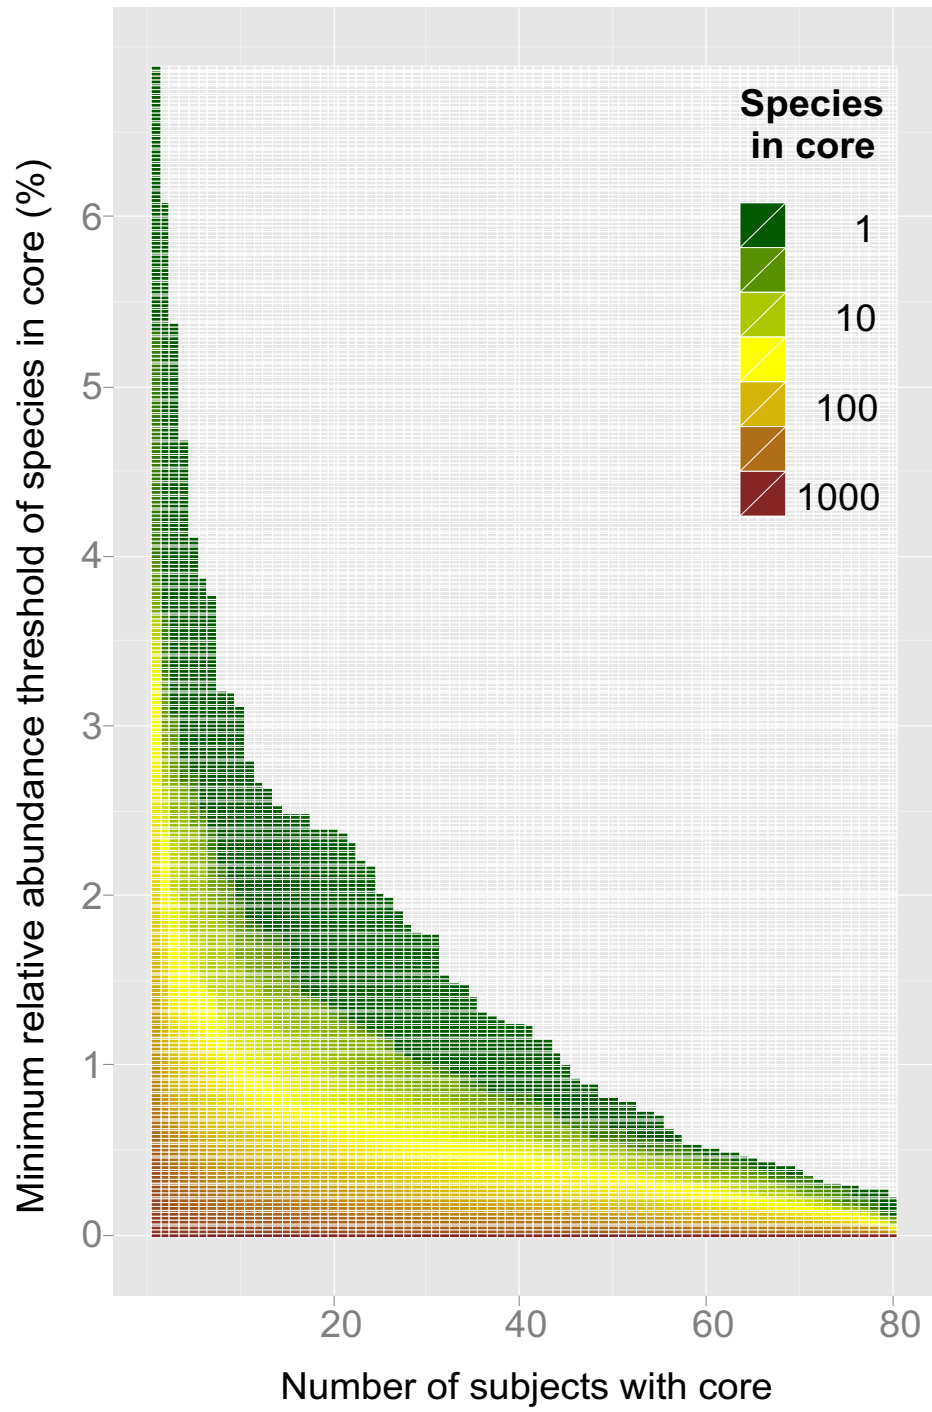

Supplement: ismej2012146x3.pdf [file ismej2012146x3.pdf]

### Bacteroidetes/Firmicutes ratio

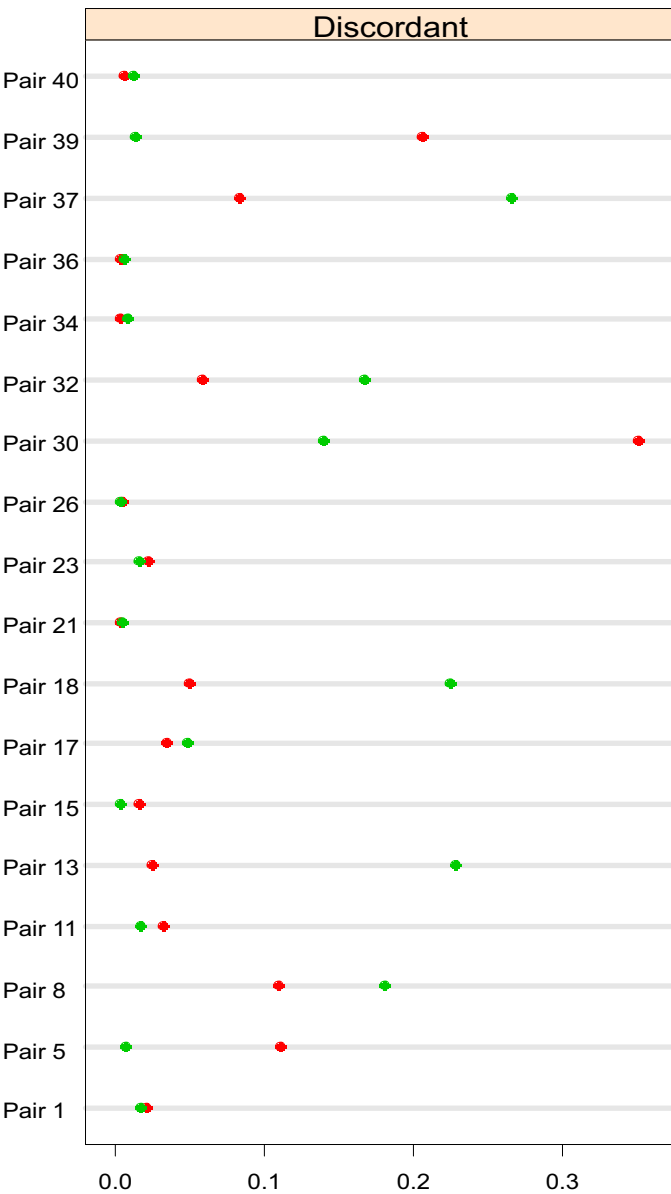

### Bacteroidetes/Firmicutes ratio

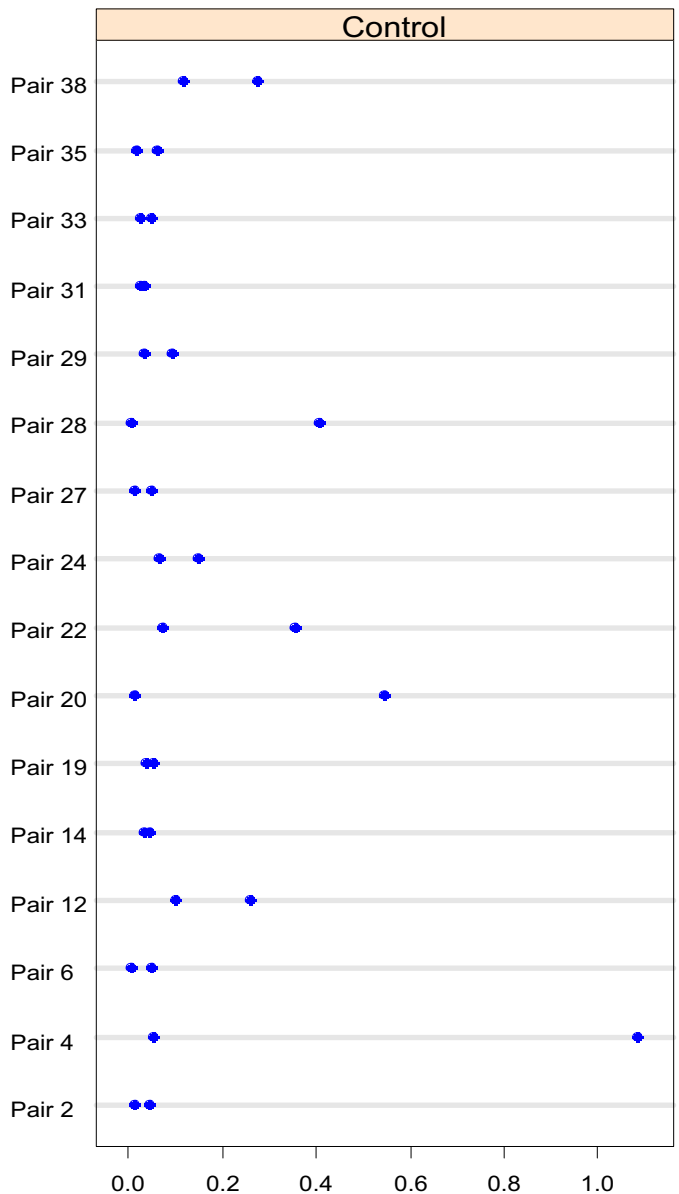

Supplement: ismej2012146x4.pdf [file ismej2012146x4.pdf]
